# Supplementary material for: Potential prognostic value of hsa-miR-18a in hepatocellular carcinoma and the underlying key down-stream gene CHRM2: a comprehensive bioinformatic analysis*
Source: Research Square preprint supplement (doi:10.21203/rs.3.rs-388879/v1), 2021-04-15
Supplement: Supplementary file 1 [file 9aee079dc32a626d8b7b72f1.xlsx]

## Sheet: Sheet 1
Target genes
ANKRD13C
ATM
ATXN1
BBX
BRWD1
CA12
CA13
CAD
CBX2
CCND1
CCND2
CHRM2
CLCC1
CREBL2
CTDSPL
DAAM2
DICER1
DIP2C
DIRAS2
DNAJC8
ELOVL1
ERI1
ESCO2
EXPH5
FAM136A
FAM3C
FBXL3
FGF1
GCLC
GIGYF1
GIT2
HCFC2
HEATR5A
HMBOX1
HMGCS1
HSF5
INO80D
IRF2
KCNH7
KCNJ2
KCNS2
KCTD16
KDM2A
KLF6
MAP3K1
MAP7D1
MAPK4
MRPL35
MYLK
NACC1
NCOA1
NEDD4
NEDD9
NFASC
NOTCH2
NR3C1
NUFIP2
OCRL
PARD6B
PDE4D
PLLP
PNISR
PRKACB
PTCHD1
PTP4A3
RAB9A
RNF4
SH3BP4
SLC12A6
SMAP2
SORBS2
TAOK1
TBC1D9B
TGFBR3
THBD
TMEM170B
TRAPPC8
UEVLD
WASF2
XYLT2
ZBTB4
ZBTB47
ZCCHC3
ZFP62
ZNF367
SOX6
RORA
SMG1
CBX7
SREBP1

## Sheet: Sheet2
pathways
Cell cycle
Thyroid hormone signaling pathway
PI3 kinase pathway
Wnt signaling pathway
Arginine biosynthesis
Muscarinic acetylcholine receptor 2 and 4 signaling pathway
HTLV-I infection
Oxytocin signaling pathway
Hippo signaling pathway
Alzheimer disease-amyloid secretase pathway
p53 signaling pathway
Angiogenesis
